# Supplementary material
Source: Springer Nature journal article supplement (https://www.springermedizin.de/resource/supplementary/13075_2013_4088_MOESM3_ESM.pdf/9696004)

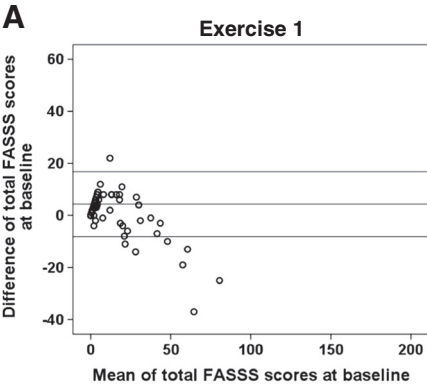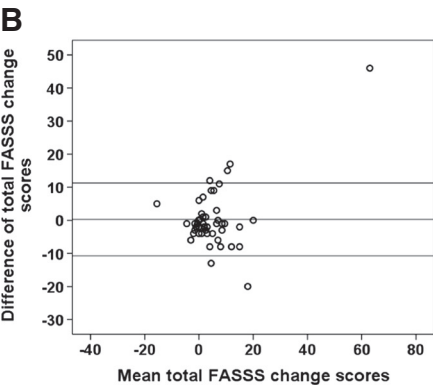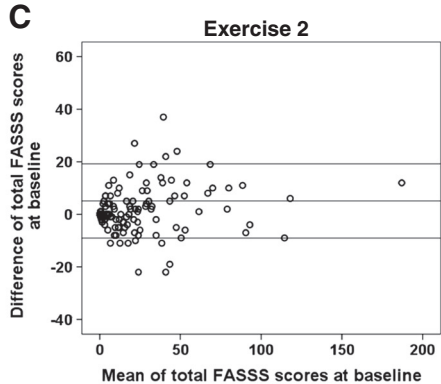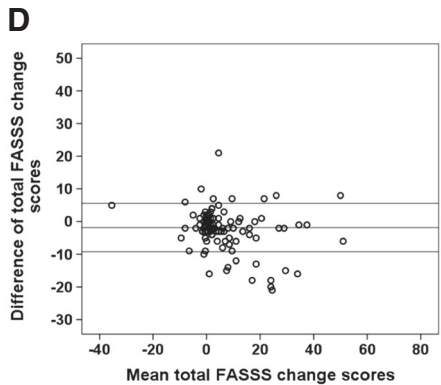

Supplement: MOESM3 [file 9696004]
